# Supplementary material
Source: publisher figshare collection journal article supplement (https://tandf.figshare.com/articles/dataset/_/3759294)
Supplement: Supplementary file 1 [file 2]

**Table S1. Ubiquitous microbial taxa inhabited the mineral surfaces.**

| Domain          | Phyla          | Class            | Order              | Family                        | Genera                        |
|-----------------|----------------|------------------|--------------------|-------------------------------|-------------------------------|
| <b>Archaea</b>  |                |                  |                    |                               |                               |
|                 | Thaumarchaeota | Marine Group I   | Incertae Sedis     | Incertae Sedis                | -                             |
|                 | Euryarchaeota  | Halobacteria     | -                  | -                             | -                             |
| <b>Bacteria</b> |                |                  |                    |                               |                               |
|                 | Actinobacteria | Actinobacteria   | -                  | -                             | -                             |
|                 | Bacteroidetes  | Bacteroidia      | Bacteroidales      | Marinilabiaceae               | Alkaliflexus                  |
|                 | Bacteroidetes  | Bacteroidia      | Bacteroidales      | Porphyromonadaceae            | Macellibacteroides            |
|                 | Bacteroidetes  | Bacteroidia      | Bacteroidales      | Porphyromonadaceae            | Paludibacter                  |
|                 | Bacteroidetes  | Cytophagia       | Cytophagales       | Cytophagaceae                 | Flexibacter                   |
|                 | Bacteroidetes  | Cytophagia       | Cytophagales       | Cytophagaceae                 | Leadbetterella                |
|                 | Bacteroidetes  | Flavobacteria    | Flavobacteriales   | Flavobacteriaceae             | Chryseobacterium              |
|                 | Bacteroidetes  | Flavobacteria    | Flavobacteriales   | Flavobacteriaceae             | Cloacibacterium               |
|                 | Bacteroidetes  | Flavobacteria    | Flavobacteriales   | Flavobacteriaceae             | Flavobacterium                |
|                 | Bacteroidetes  | Sphingobacteriia | Sphingobacteriales | Chitinophagaceae              | Ferruginibacter               |
|                 | Bacteroidetes  | Sphingobacteriia | Sphingobacteriales | Chitinophagaceae              | Flavisolibacter               |
|                 | Bacteroidetes  | Sphingobacteriia | Sphingobacteriales | Chitinophagaceae              | uncultured                    |
|                 | Bacteroidetes  | Sphingobacteriia | Sphingobacteriales | Saprospiraceae                | uncultured                    |
|                 | Bacteroidetes  | Sphingobacteriia | Sphingobacteriales | Sphingobacteriaceae           | Mucilaginibacter              |
|                 | Bacteroidetes  | Sphingobacteriia | Sphingobacteriales | Sphingobacteriaceae           | Pedobacter                    |
|                 | Bacteroidetes  | SB 1             | -                  | -                             | -                             |
|                 | Bacteroidetes  | Vadin HA 17      | -                  | -                             | -                             |
|                 | Bacteroidetes  | WCHB 1 32        | -                  | -                             | -                             |
|                 | Chlamydiae     | Chlamydiae       | Chlamydiales       | Simkaniaceae                  | Candidatus<br>Rhabdochlamydia |
|                 | Cyanobacteria  | Cyanobacteria    | SubsectionIV       | FamilyII                      | Calothrix                     |
|                 | Deinococcus    | Deinococci       | Deinococcales      | Trueperaceae                  | Truepera                      |
|                 | Thermus        |                  |                    |                               |                               |
|                 | Elusimicrobia  | Elusimicrobia    |                    |                               |                               |
|                 | Firmicutes     | Bacilli          | Bacillales         | Staphylococcaceae             | Staphylococcus                |
|                 | Firmicutes     | Bacilli          | Lactobacillales    | Aerococcaceae                 | Aerococcus                    |
|                 | Firmicutes     | Bacilli          | Lactobacillales    | Lactobacillaceae              | Lactobacillus                 |
|                 | Firmicutes     | Bacilli          | Lactobacillales    | Streptococcaceae              | Lactococcus                   |
|                 | Firmicutes     | Bacilli          | Lactobacillales    | Streptococcaceae              | Streptococcus                 |
|                 | Firmicutes     | Clostridia       | Clostridiales      | Clostridiaceae                | Clostridium                   |
|                 | Firmicutes     | Clostridia       | Clostridiales      | Family XI Incertae<br>Sedis   | Anaerococcus                  |
|                 | Firmicutes     | Clostridia       | Clostridiales      | Family XI Incertae<br>Sedis   | Finegoldia                    |
|                 | Firmicutes     | Clostridia       | Clostridiales      | Family XIII Incertae<br>Sedis | Mogibacterium                 |

|                 |                       |                    |                     |                 |
|-----------------|-----------------------|--------------------|---------------------|-----------------|
| Firmicutes      | Clostridia            | Clostridiales      | Ruminococcaceae     | uncultured      |
| Firmicutes      | Erysipelotrichia      | Erysipelotrichales | Erysipelotrichaceae | Asteroleplasma  |
| Fusobacteria    | Fusobacteriia         | Fusobacteriales    | Fusobacteriaceae    | Fusobacterium   |
| Fusobacteria    | Fusobacteriia         | Fusobacteriales    | Leptotrichiaceae    | uncultured      |
| Proteobacteria  | Alphaproteobacteria   | Caulobacterales    | Caulobacteraceae    | Brevundimonas   |
| Proteobacteria  | Alphaproteobacteria   | Sphingomonadales   | Sphingomonadaceae   | Sphingomonas    |
| Proteobacteria  | Betaproteobacteria    | Burkholderiales    | Alcaligenaceae      | Paenalcaligenes |
| Proteobacteria  | Betaproteobacteria    | Burkholderiales    | Comamonadaceae      | Variovorax      |
| Proteobacteria  | Betaproteobacteria    | Neisseriales       | Neisseriaceae       | uncultured      |
| Proteobacteria  | Epsilonproteobacteria | Campylobacteriales | Campylobacteraceae  | Campylobacter   |
| Proteobacteria  | Gammaproteobacteria   | Enterobacteriales  | Enterobacteriaceae  | Escherichia     |
|                 |                       |                    |                     | Shigella        |
| Proteobacteria  | Gammaproteobacteria   | Legionellales      | Coxiellaceae        | Aquicella       |
| Proteobacteria  | Gammaproteobacteria   | Legionellales      | Coxiellaceae        | Coxiella        |
| Proteobacteria  | Gammaproteobacteria   | Pseudomonadales    | Moraxellaceae       | Acinetobacter   |
| Proteobacteria  | Gammaproteobacteria   | Pseudomonadales    | Moraxellaceae       | Enhydrobacter   |
| Proteobacteria  | Gammaproteobacteria   | Pseudomonadales    | Moraxellaceae       | Psychrobacter   |
| Proteobacteria  | Gammaproteobacteria   | Pseudomonadales    | Pseudomonadaceae    | Pseudomonas     |
| Proteobacteria  | Gammaproteobacteria   | Xanthomonadales    | Nevskiaceae         | Nevskia         |
| Spirochaetae    | Spirochaetes          | Spirochaetales     | Spirochaetaceae     | Borrelia        |
| Verrucomicrobia | Verrucomicrobiae      | Verrucomicrobiales | Rubritaleaceae      | Rubritalea      |
| Verrucomicrobia | Verrucomicrobiae      | Verrucomicrobiales | Verrucomicrobiaceae | Akkermansia     |
| Verrucomicrobia | Spartobacteria        | -                  | -                   | -               |

## Fungi

|                   |                  |   |   |   |
|-------------------|------------------|---|---|---|
| Ascomycota        | Pezizomycotina   | - | - | - |
| Ascomycota        | -                | - | - | - |
| Basidiomycota     | Agaricomycotina  | - | - | - |
| Basidiomycota     | uncultured       | - | - | - |
| Chytridiomycota   | Chytridiomycetes | - | - | - |
| Kickxellomycotina | Glomeromycota    | - | - | - |
| oromycotina       | orales           | - | - | - |
