# Supplementary material
Source: publisher figshare collection journal article supplement (https://tandf.figshare.com/articles/dataset/_/3759294)
Supplement: Supplementary file 3 [file 2]

**Table S2.** Phylogenetic diversity (PD), net relatedness index (NRI), and nearest taxa index (NTI) results for the 16S rRNA gene (16S rDNA) and 18S rRNA gene (18S rDNA) sequences, respectively.

| Mineral    | Horizon | Community | 16S rDNA |          |             |             | 18S rDNA |          |              |              |
|------------|---------|-----------|----------|----------|-------------|-------------|----------|----------|--------------|--------------|
|            |         |           | PD       | <i>N</i> | NRI         | NTI         | PD       | <i>N</i> | NRI          | NTI          |
| Apatite    | O       | Ap_O_1    | 28.26    | 139      | 0.03        | -2.01       | 67.44    | 135      | <b>-1.21</b> | <b>-1.29</b> |
|            |         | Ap_O_2    | 85.94    | 730      | <b>1.30</b> | <b>1.54</b> | 34.17    | 59       | <b>-1.38</b> | <b>-1.26</b> |
|            | E       | Ap_E_1    | 114.81   | 1136     | <b>7.36</b> | <b>4.72</b> | NA       | NA       | NA           | NA           |
|            |         | Ap_E_2    | 92.61    | 992      | <b>6.54</b> | <b>5.18</b> | 89.40    | 110      | 3.60         | -0.49        |
|            | B       | Ap_B_1    | 59.31    | 413      | 0.13        | 0.23        | 103.16   | 183      | -0.55        | <b>-1.00</b> |
|            |         | Ap_B_2    | 97.87    | 864      | <b>4.78</b> | <b>3.32</b> | 67.55    | 170      | <b>-1.71</b> | <b>-1.80</b> |
| Biotite    | O       | Bio_O_1   | 55.24    | 377      | -0.66       | -0.05       | NA       | NA       | NA           | NA           |
|            |         | Bio_O_2   | 15.37    | 70       | 0.56        | <b>1.85</b> | 39.72    | 61       | <b>-1.37</b> | <b>-1.48</b> |
|            | E       | Bio_E_1   | 23.18    | 118      | -2.17       | -3.74       | 51.15    | 97       | <b>-1.31</b> | <b>-1.68</b> |
|            |         | Bio_E_2   | 38.67    | 257      | -3.09       | -1.16       | 92.67    | 200      | <b>-1.40</b> | <b>-2.11</b> |
|            | B       | Bio_B_1   | 50.84    | 361      | -3.58       | -4.05       | 277.68   | 973      | -0.96        | <b>-1.22</b> |
|            |         | Bio_B_2   | 25.84    | 141      | <b>1.25</b> | <b>1.51</b> | 108.88   | 254      | <b>-1.27</b> | <b>-1.02</b> |
| Oligoclase | O       | Oli_O_1   | 9.61     | 43       | 0.03        | 0.73        | 292.99   | 848      | <b>-3.24</b> | <b>-3.38</b> |
|            | E       | Oli_E_1   | 21.24    | 87       | 0.18        | 1.03        | 222.29   | 648      | <b>-1.02</b> | <b>-1.10</b> |
|            |         | Oli_E_2   | 17.49    | 90       | <b>1.80</b> | <b>2.59</b> | 344.81   | 1152     | <b>-2.29</b> | <b>-1.89</b> |
|            | B       | Oli_B_1   | 9.15     | 47       | 1.11        | <b>2.06</b> | 384.33   | 1239     | <b>-2.07</b> | <b>-1.56</b> |
|            |         | Oli_B_2   | 19.08    | 96       | <b>1.39</b> | <b>1.73</b> | 500.43   | 1928     | <b>-1.67</b> | <b>-2.69</b> |

Patterns of relatedness (i.e., whether microbial communities are phylogenetically structured) were investigated by computing metrics of community phylogenetic structure (Webb et al., 2002 and Webb, 2000). Communities were compared in relation to the net relatedness index (NRI) and the nearest taxon index (NTI) both of which indicate whether members of a community co-occur with closely related taxa more often than expected by chance (i.e., clustering; high and positive values) or not (i.e., overdispersion; low and negative values).

Notes: 1000 randomisations were used to calculate NRI and NTI. Numbers in bold signify P significance at an alpha level of 0.05. *N* = number of operational taxonomic units (OTUs) observed in a community, NA = Data not available.
