# Supplementary material
Source: publisher figshare collection journal article supplement (https://tandf.figshare.com/articles/dataset/_/3759294)

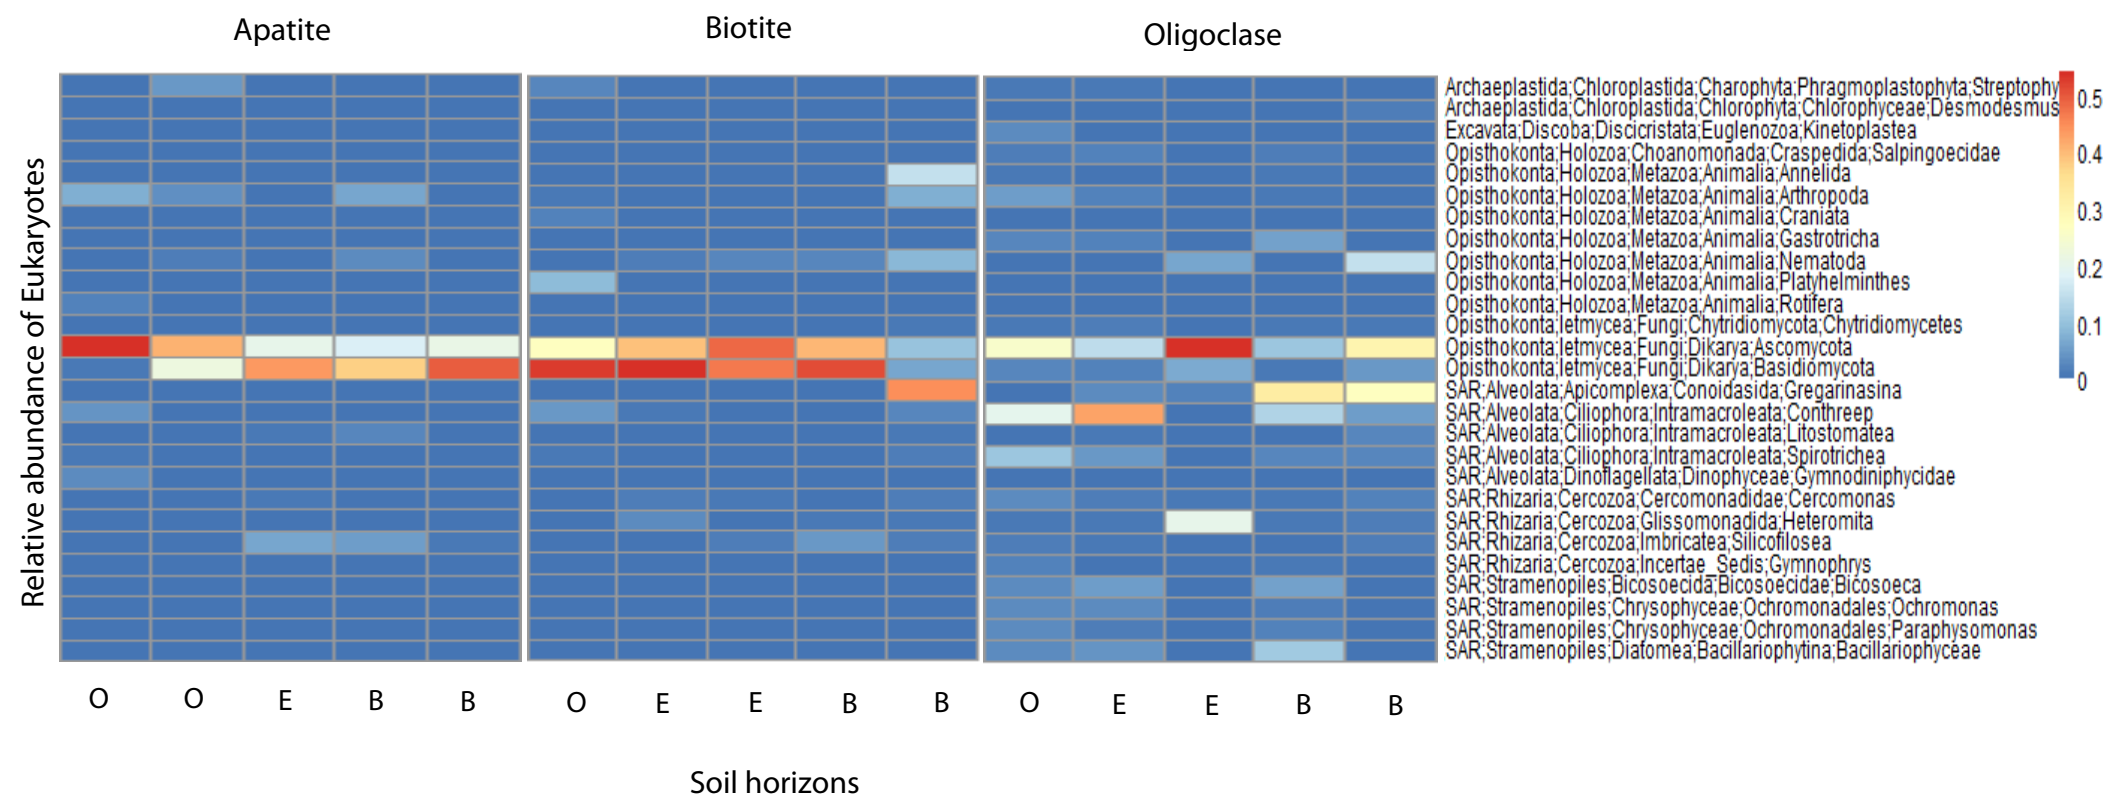

Figure S2

Supplement: Supplementary file 2 [file 2]

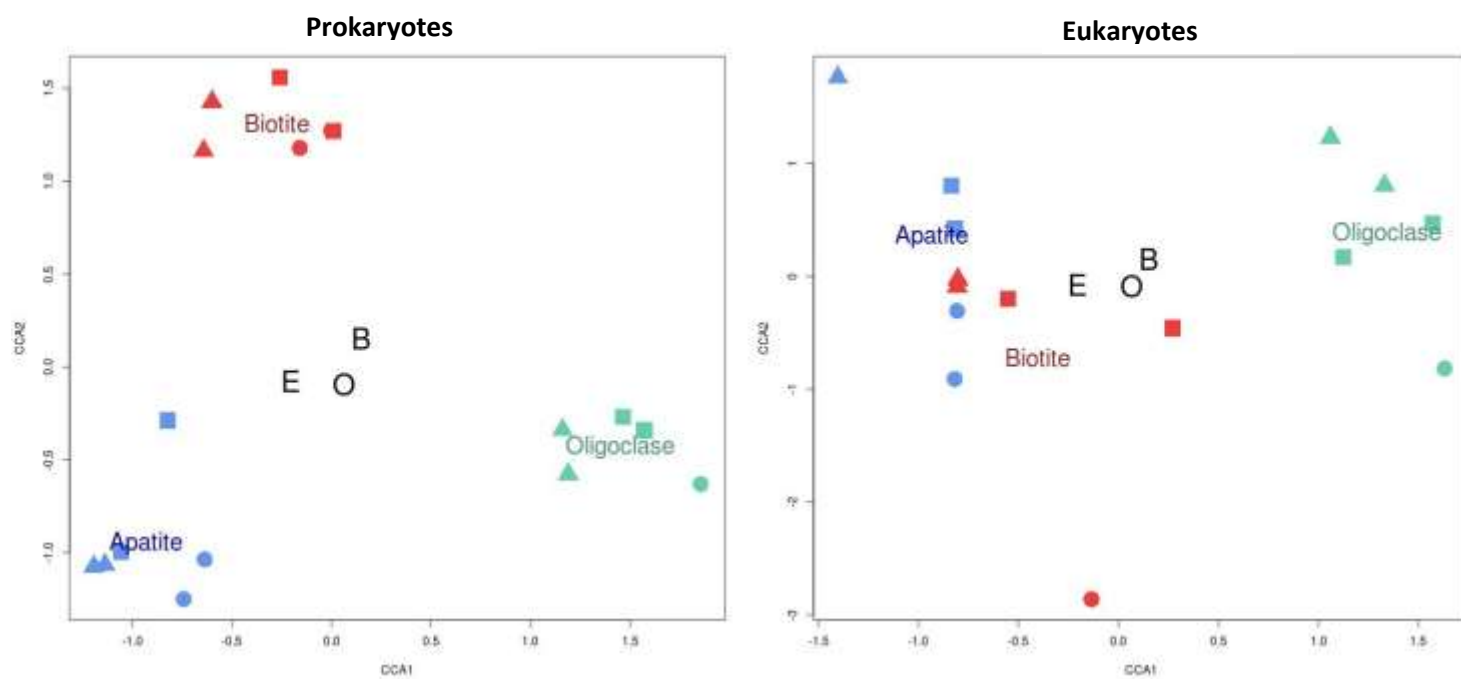

Figure S3

Supplement: Supplementary file 4 [file 2]

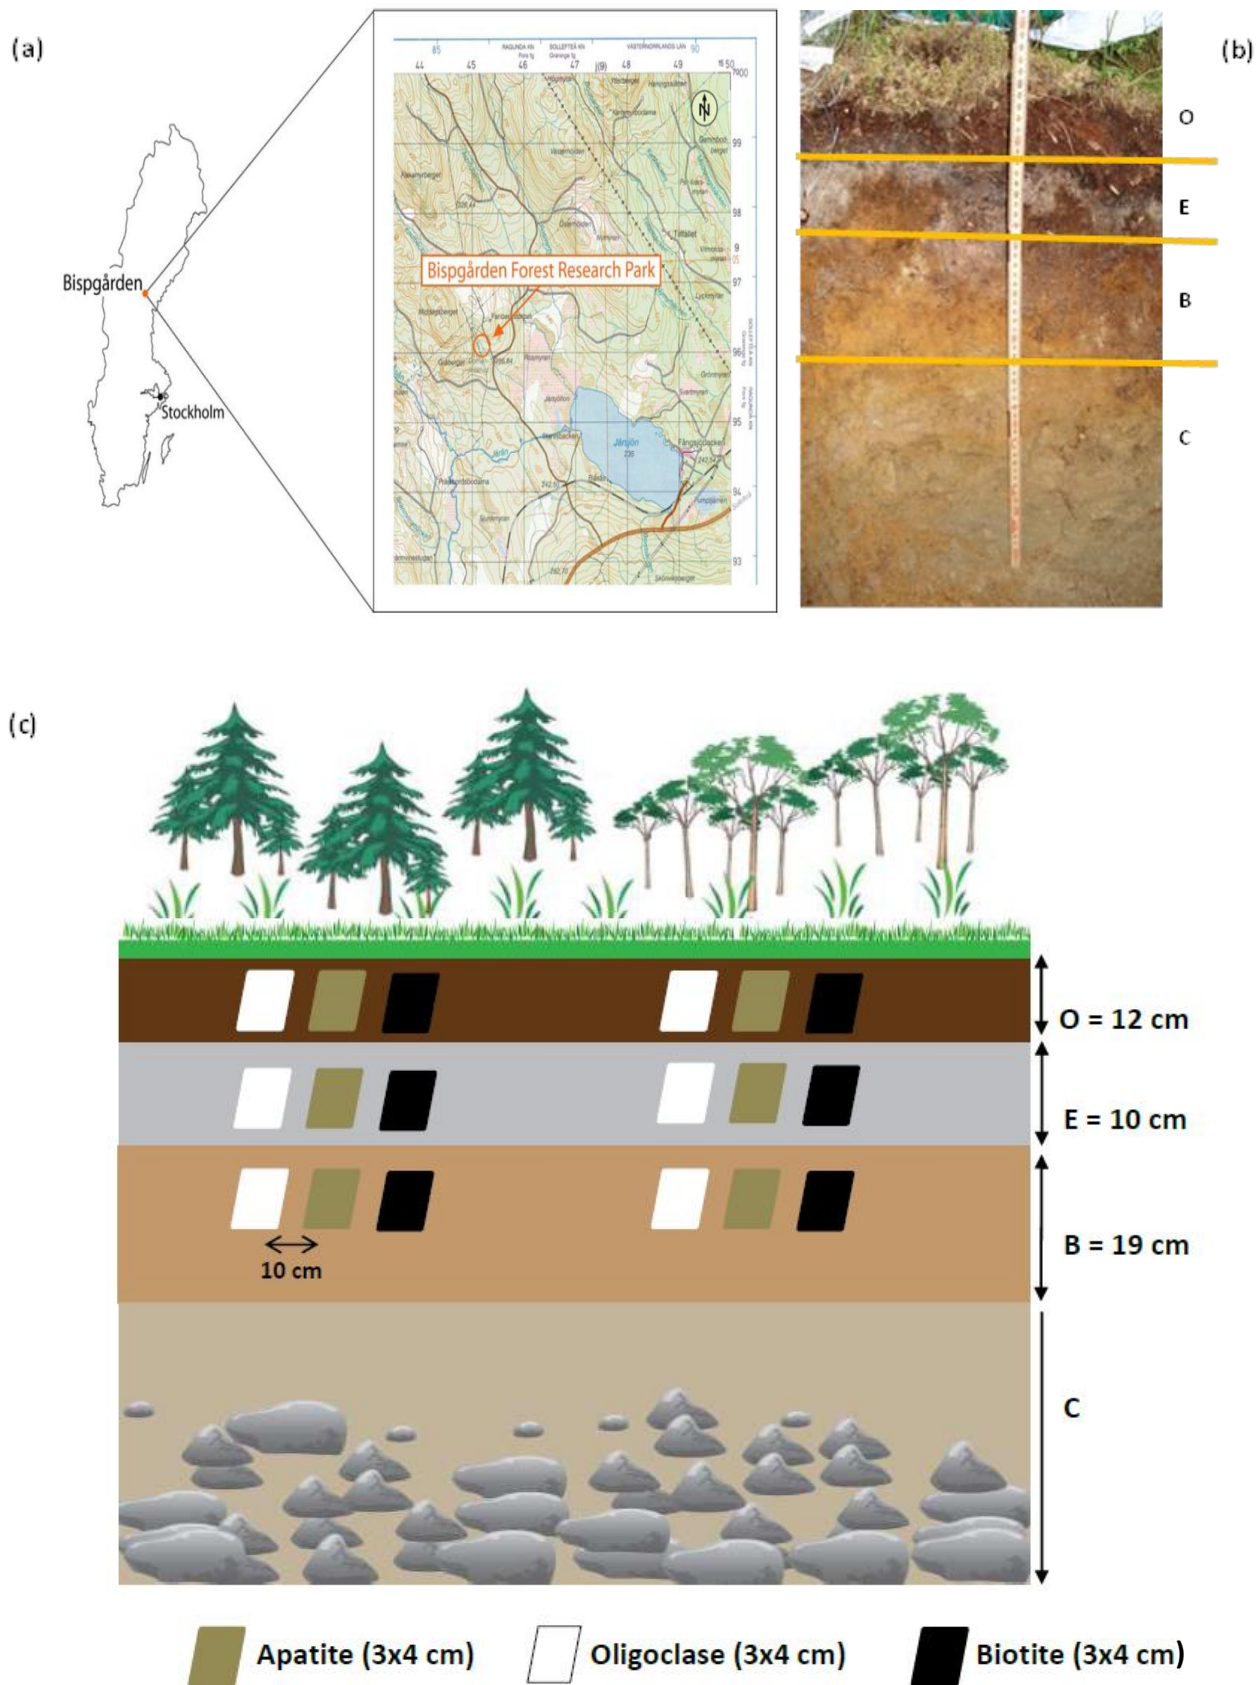

Figure S1

Supplement: Supplementary file 5 [file 2]
